# Supplementary material
Source: MDPI journal article supplement (https://www.mdpi.com/2227-9040/11/2/132)
Supplement: s1 [file s1]

## Supplementary Information

### Facile Electrodeposition Based Chemosensors Using PANI and C-Hybrid Nanomaterials for the Selective Detection of Ammonia and Nitrogen Dioxide at Room Temperature

Alexandru Grigoroiu <sup>1</sup>, Carmen-Marinela Mihailescu <sup>1,2,\*</sup>, Mihaela Savin <sup>1,\*</sup>,  
Carmen Aura Moldovan <sup>1</sup>, Costin Brasoveanu <sup>1</sup>, Silviu Dinulescu <sup>1</sup>, Nikolay Djourellov <sup>3</sup>,  
Georgescu Vlad Cristian <sup>4</sup>, Oana Brincoveanu <sup>1</sup>, Gabriel Craciun <sup>1</sup>, Cristina Pachiu <sup>1</sup>, Ion Stan <sup>4</sup>,  
Bogdan Firtat <sup>1</sup>, George Stelian Muscalu <sup>1</sup>, Marian Ion <sup>1</sup> and Adrian Anghelescu <sup>1</sup>

<sup>1</sup> National Institute for Research and Development in Microtechnologies (IMT Bucharest), 126A Iancu Nicolae Street, 72996 Bucharest, Romania

<sup>2</sup> Pharmacy Faculty, "Titu Maiorescu" University, 16 Sincal, 040314 Bucharest, Romania

<sup>3</sup> Extreme Light Infrastructure-Nuclear Physics (ELI-NP), 'Horia Hulubei' National R&D Institute for Physics and Nuclear Engineering (IFIN-HH), 30 Reactorului Street, 077125 Măgurele, Romania

<sup>4</sup> Romelgen, 82 Baicului Street, 021771 Bucharest, Romania

\* Correspondence: carmen.mihailescu@imt.ro (C.-M.M.); mihaela.savin@imt.ro (M.S.)

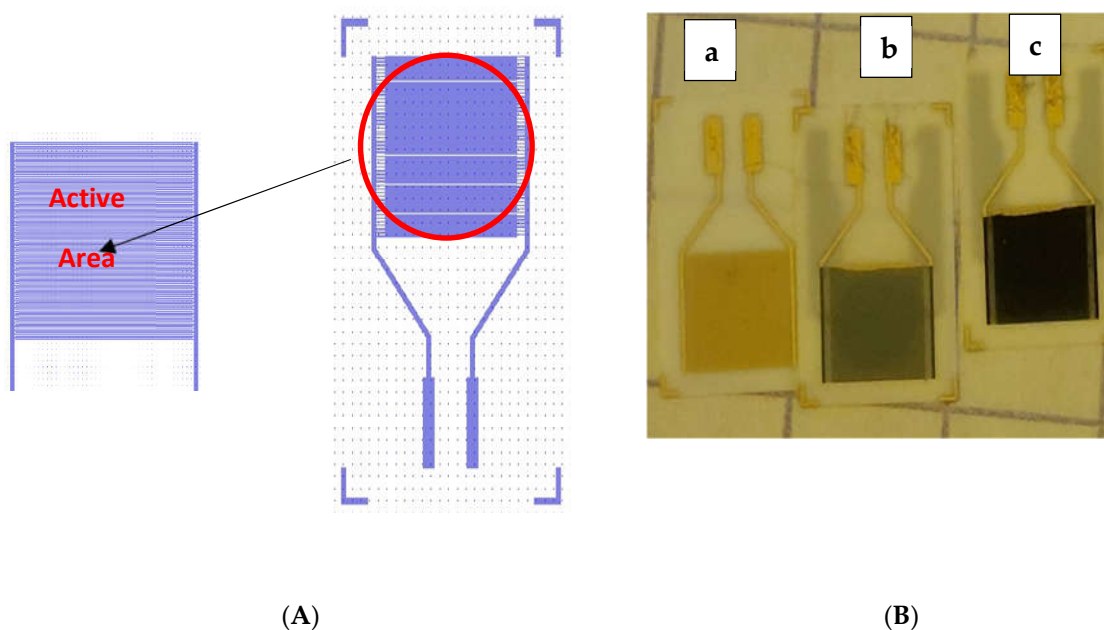

**Figure S1.** (A) Interdigitated electrode layout on ceramic substrate ( $\text{Al}_2\text{O}_3$ ), (B) a. Fabricated sensor; b–c. sensors with electrodeposited films.

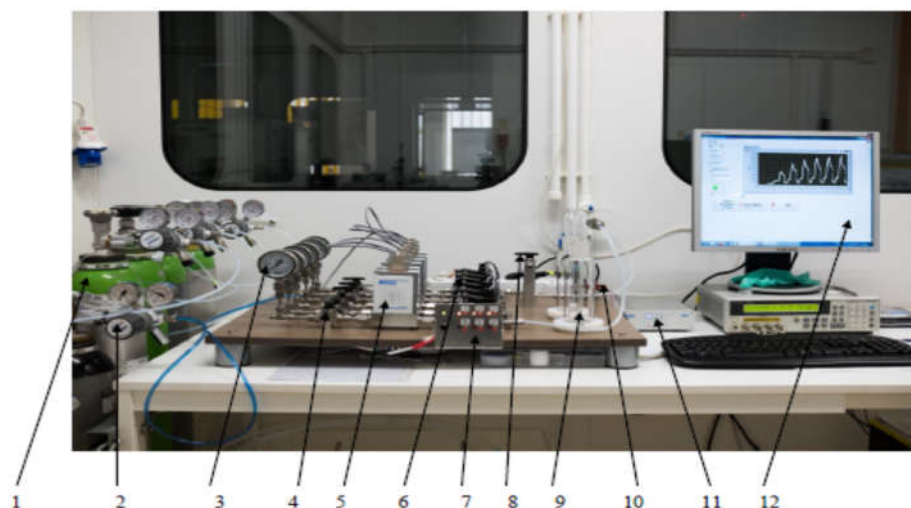

**Figure S2.** Diagram of testing platform Five gas supply cylinders with the following characteristics: 1. Nitrogen-N (99.999%), as a carrier gas in a 10L/200bar cylinder - Mixture 1000ppm carbon monoxide-CO in nitrogen in a 10L/150bar bottle - Mixture of 100ppm nitrogen dioxide-NO<sub>2</sub> in air in a 10L/150bar bottle - 500ppm ammonia-NH<sub>3</sub> mixture in nitrogen in a 10L/150bar bottle - 20ppm formaldehyde-CH<sub>2</sub>O mixture in nitrogen in a 10L/150bar bottle; 2. Five Pressure Regulators of which: - a chromed brass regulator 200/4bar for the nitrogen cylinder - Four INOX 200/4bar regulators for the other cylinders; 3. Six INOX Manometers, 0-2.5bar for gas pressure monitoring 4. Six INOX ball valves that allow/block the circulation of gases to the test chamber 5. Six MASS FLOW CONTROLLERS that regulate the mass flow. 6. Six electro valves that allow/block the circulation of gases towards the test chamber 7. The control circuit of the solenoid valves 8. A three-way ball valve that allows access of the humidified gas to the test chamber or exhaust of the gas to the outside 9. Bubbler (humidifier) that allows gases to be humidified for sensor testing 10. The test chamber that allows the testing of four sensors to a gas or to a mixture of gases; 11. Controller for controlling flow controllers 12. Interface for data acquisition and definition of test routines.

**Table S1.** Metrics employed for the PCA. One vector is composed of all elements in the table. Hence metrics are collected for each tested film.

| M1                             | M2        | M3                              | M4         | M5         | M6                          | M7         | M8                              | M9                      | M10        | M11                   | M12       | M13        |
|--------------------------------|-----------|---------------------------------|------------|------------|-----------------------------|------------|---------------------------------|-------------------------|------------|-----------------------|-----------|------------|
| Formaldehyde mean resistance   |           |                                 |            |            | Formaldehyde resistance Std |            |                                 |                         |            | Nitrogen dioxide mean |           |            |
| 40<br>ppb                      | 80<br>ppb | 120<br>ppb                      | 160<br>ppb | 200<br>ppb | 40<br>ppb                   | 80<br>ppb  | 120<br>ppb                      | 160<br>ppb              | 200<br>ppb | 8<br>ppm              | 16<br>ppm | 32<br>ppm  |
| M14                            | M15       | M16                             | M17        | M18        | M19                         | M20        | M21                             | M22                     | M23        | M24                   | M25       | M26        |
| resistance                     |           | Nitrogen dioxide resistance Std |            |            |                             |            | Carbon monoxide mean resistance |                         |            |                       |           |            |
| 60<br>ppm                      | 90<br>ppm | 8<br>ppm                        | 16<br>ppm  | 32<br>ppm  | 60<br>ppm                   | 90<br>ppm  | 2<br>ppm                        | 10<br>ppm               | 20<br>ppm  | 40<br>ppm             | 50<br>ppm | 100<br>ppm |
| M27                            | M28       | M29                             | M30        | M31        | M32                         | M33        | M34                             | M35                     | M36        | M37                   | M38       | M39        |
| Carbon monoxide resistance Std |           |                                 |            |            |                             |            |                                 | Ammonia mean resistance |            |                       |           |            |
| 200<br>ppm                     | 2<br>ppm  | 10<br>ppm                       | 20<br>ppm  | 40<br>ppm  | 50<br>ppm                   | 100<br>ppm | 200<br>ppm                      | 5<br>ppm                | 10<br>ppm  | 20<br>ppm             | 50<br>ppm | 100<br>ppm |
| M40                            | M41       | M42                             | M43        | M44        | M45                         | M46        | M47                             | M48                     | M49        | M50                   | M51       | M52        |
| Ammonia resistance Std         |           |                                 |            |            |                             |            |                                 |                         | Mean       | Std                   | Mean      | Std        |

|            |            |          |           |           |           |            |            |            |     |     |                |                |
|------------|------------|----------|-----------|-----------|-----------|------------|------------|------------|-----|-----|----------------|----------------|
| 150<br>ppm | 300<br>ppm | 5<br>ppm | 10<br>ppm | 20<br>ppm | 50<br>ppm | 100<br>ppm | 150<br>ppm | 300<br>ppm | Air | Air | N <sub>2</sub> | N <sub>2</sub> |
|------------|------------|----------|-----------|-----------|-----------|------------|------------|------------|-----|-----|----------------|----------------|

**Table S2.** Initial values of PANI-MWCNT-NH<sub>2</sub> (10 CV cycles and 15 CV cycles) film resistances in air and nitrogen at different humidity values

| No. | Cycles<br>no. | RH  | R <sub>air</sub> (kΩ) | R <sub>N<sub>2</sub></sub> (kΩ) | R <sub>N<sub>2</sub></sub> -R <sub>air</sub><br>(kΩ) |
|-----|---------------|-----|-----------------------|---------------------------------|------------------------------------------------------|
| 1.  | 10            | 10% | 1.88                  | 2.78                            | 0.9                                                  |
|     | 15            | 10% | 2.10                  | 3.60                            | 1.5                                                  |
| 2.  | 10            | 25% | 7.70                  | 10.30                           | 2.6                                                  |
|     | 15            | 25% | 6.00                  | 9.70                            | 3.7                                                  |
| 3.  | 10            | 50% | 8.80                  | 12.70                           | 3.9                                                  |
|     | 15            | 50% | 6.40                  | 10.80                           | 4.4                                                  |

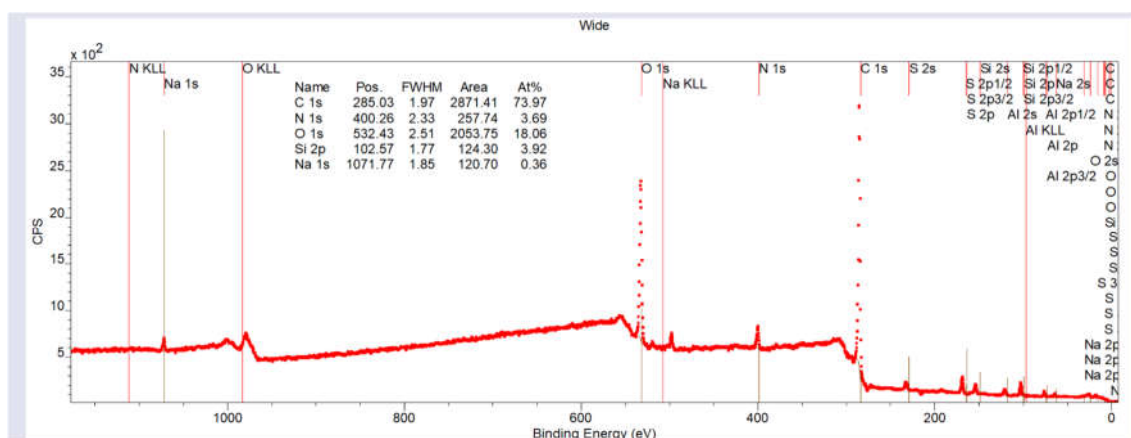

**Figure S3.** XPS survey spectra of the PANI-MWCNT-NH<sub>2</sub> film.

**Tabel S3.** The component for C 1s spectra of PANI and PANI-MWCNT-NH<sub>2</sub>.

| Component                  | C-C,<br>C-H | C-O,<br>C-N | C=O  | O-C=O | Aromatic |
|----------------------------|-------------|-------------|------|-------|----------|
| PANI-MWCNT-NH <sub>2</sub> | 79.17       | 14.39       | 4.88 | 1.38  | 0.17     |
| PANI                       | 63.53       | 29.34       | 3.25 | 0.63  | 3.25     |

**Tabel S4.** The component for O 1s spectra.

| Component                  | C=O   | C-O-C, C-O | C-O-H, H <sub>2</sub> O |
|----------------------------|-------|------------|-------------------------|
| PANI-MWCNT-NH <sub>2</sub> | 13.15 | 78.84      | 8.02                    |
| PANI                       | 42.35 | -          | 57.65                   |

**Tabel S5.** The component for N 1s spectra.

| Component                  | C-NH- | C-N=  | C-N <sup>+</sup> |
|----------------------------|-------|-------|------------------|
| PANI-MWCNT-NH <sub>2</sub> | 67.84 | 23.82 | 8.34             |
| PANI                       | 94.66 | 4.76  | 0.57             |

**Table S6.** Resistance values for PANI-rGO-ZnO (ANI in 1MHCl) films obtained following the electrodeposition of ZnO at 80 °C.

| Aniline ratio % | Zn(NO <sub>3</sub> ) <sub>2</sub> ratio % | GO % | Resistance        |
|-----------------|-------------------------------------------|------|-------------------|
| 2               | 3                                         | 0.8  | 0.4 kΩ            |
| 6.5             | 1.5                                       | 2    | 65.49 kΩ± 6.47 kΩ |
| 6.5             | 6                                         | 2    | > 1 MΩ            |

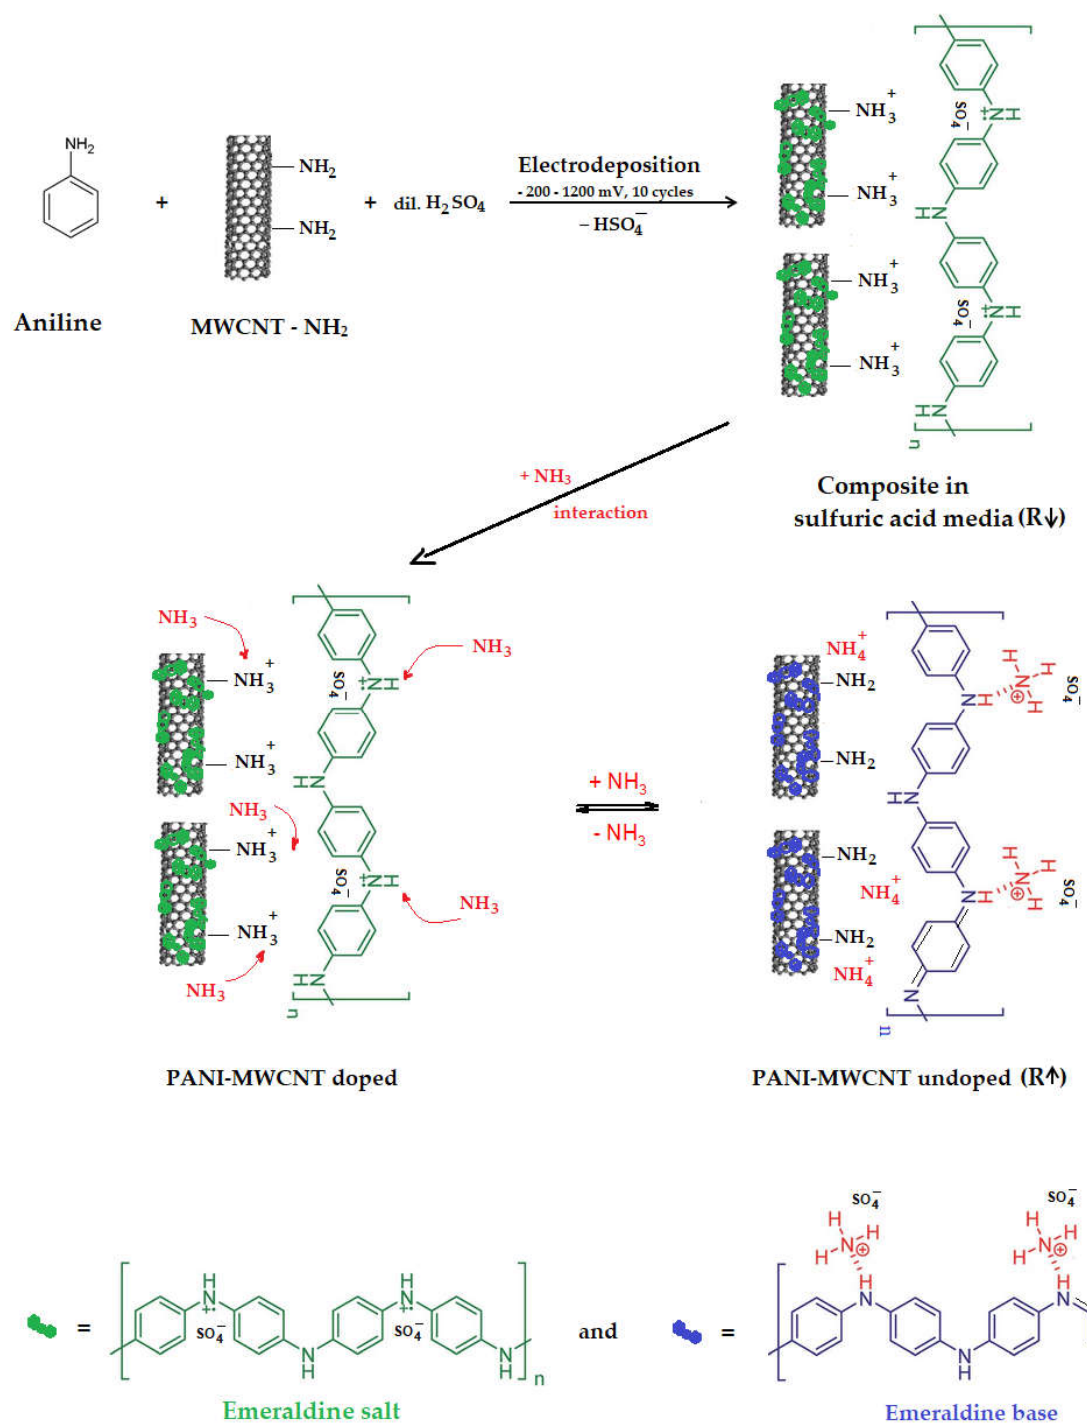

**Figure S4.** Electrodeposition stage for PANI-MWCNT-NH<sub>2</sub> with doped PANI in acidic environments and undoped PANI in basic environments after ammonia exposure.

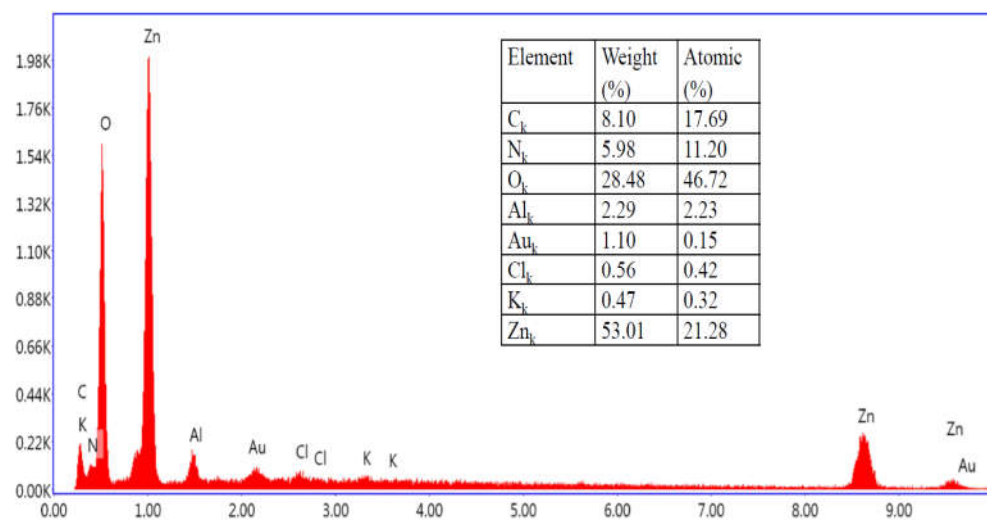

**Figure S5.** EDX spectra of PANI-rGO-ZnO.

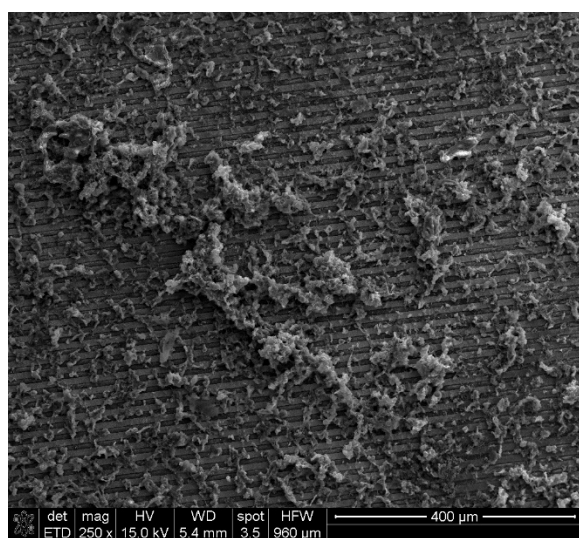

**(A)**

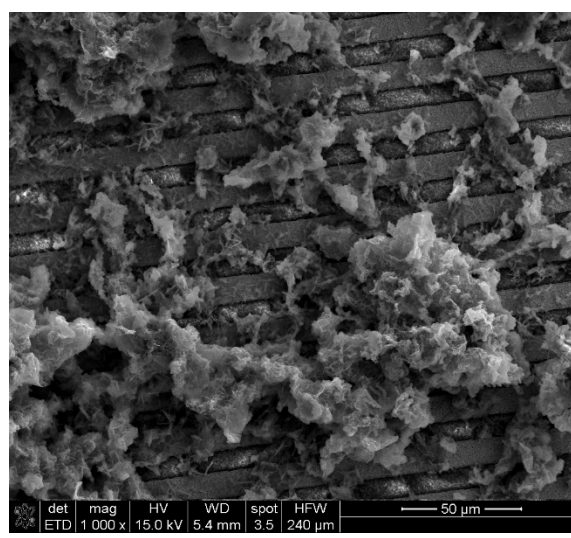

**(B)**

**Figure S6.** SEM images of the active area of the PANI-rGO-ZnO sensor at different magnifications.

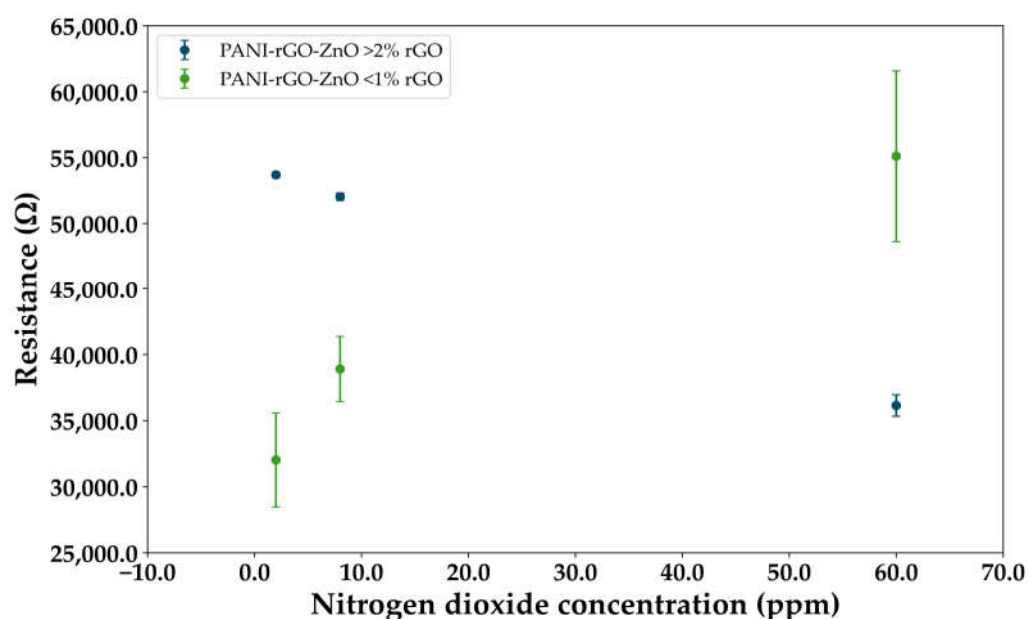

**Figure S7.** Resistances changes correlated with %rGO content for PANI-rGO-ZnO.

**Table S7.** Fabrication protocol for the sensors employed in the selection process.

| # Chip | Sensing Layer                                      | Fabrication Details of the Layers                                                                                                                                                                                                |
|--------|----------------------------------------------------|----------------------------------------------------------------------------------------------------------------------------------------------------------------------------------------------------------------------------------|
| 1      | PANI:PSS-SWCNT-COOH                                | CV: 8 cycles in water solution with ANI 0.1M; polystyrene sulphonate (PSS)- 4% with 0.004%SWCNT-COOH; -0.2 V-0.9V, v=50mV/s                                                                                                      |
| 2      | PANI-rGO                                           | rGO 1mg/mL reduced with acid ascorbic in<br>CV 10 cycles electrodeposition -600-1600mV, v=50mv/s                                                                                                                                 |
| 3      | PANI-rGO                                           | Method from this work for PANI-rGO electrodeposition (presented in the experimental section)                                                                                                                                     |
| 4      | PANI-MWCNT-NH <sub>2</sub>                         | CV: 10 cycles 200 mV and 1200 mV with a scanning speed of 50 mV/sec.; 0.5% PSS, 0.007g of MWCNT-NH <sub>2</sub> 0.5 M H <sub>2</sub> SO <sub>4</sub> and 0.09 M ANI (method detailed in experimental section);                   |
| 5      | PEDOT-rGO                                          | 10 mM EDOT with 2mg/mL GO, 30 seconds coulometry at 970mV and 30 seconds GO reduction at -850mV                                                                                                                                  |
| 6      | PANI                                               | CV: 15 cycles; 0.10 M ANI in 0.2 M H <sub>2</sub> SO <sub>4</sub> ; 0.2 V-0.9V                                                                                                                                                   |
| 7      | Polypyrrol-reduced graphene-ferrocene (PPY-rGO-Fc) | CV 8 cycles 0.2mg/mL GO and 0.1M pyrrole in phosphate buffered saline (PBS) pH 7.4 and 2mM Fc<br>GO reduction with CV 8 cycles between 0.6V–1.5 V, V=25mv/s and 1min Chronoamperometry for Fc electrodeposition at -100mV<br>PPy |
| 8      | PPY-GO                                             | CV 8 cycles 0.2mg/mL GO and 0.1M pyrrole in phosphate buffered saline (PBS) pH 7.4<br>GO reduction with CV 8 cycles between 0.6V–1.5 V, v=25 mv/s<br>0.1 M PPy (-0.2V-0.8V, 8 cycles v = 100mV/s)                                |
| 9      | PEDOT-MWCNT-NH <sub>2</sub>                        | Solutie in water with: 10 mM EDOT:PEG (21:1,v:v), MWCNT-NH <sub>2</sub> :PSS (1:66, w:w); 20 seconds Coulometry at 970mV                                                                                                         |



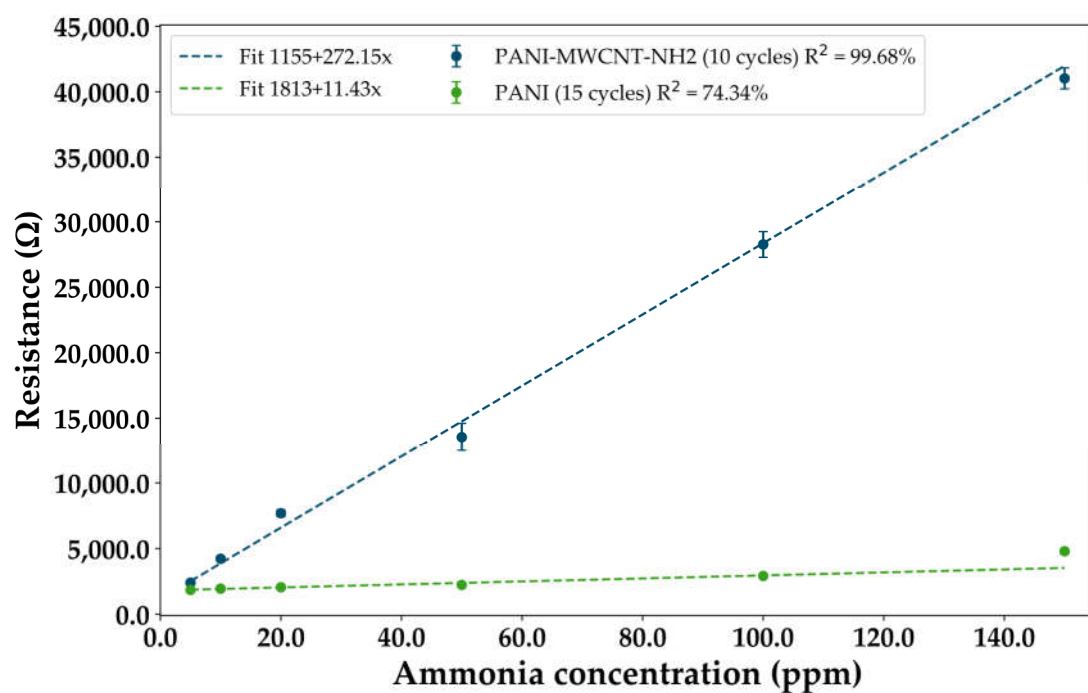

**Figure S8.** Response and linearity of two sensors, on using only PANI and one adding MWCNT-NH<sub>2</sub> to PANI, on measuring ammonia concentration in a nitrogen atmosphere without added humidity.

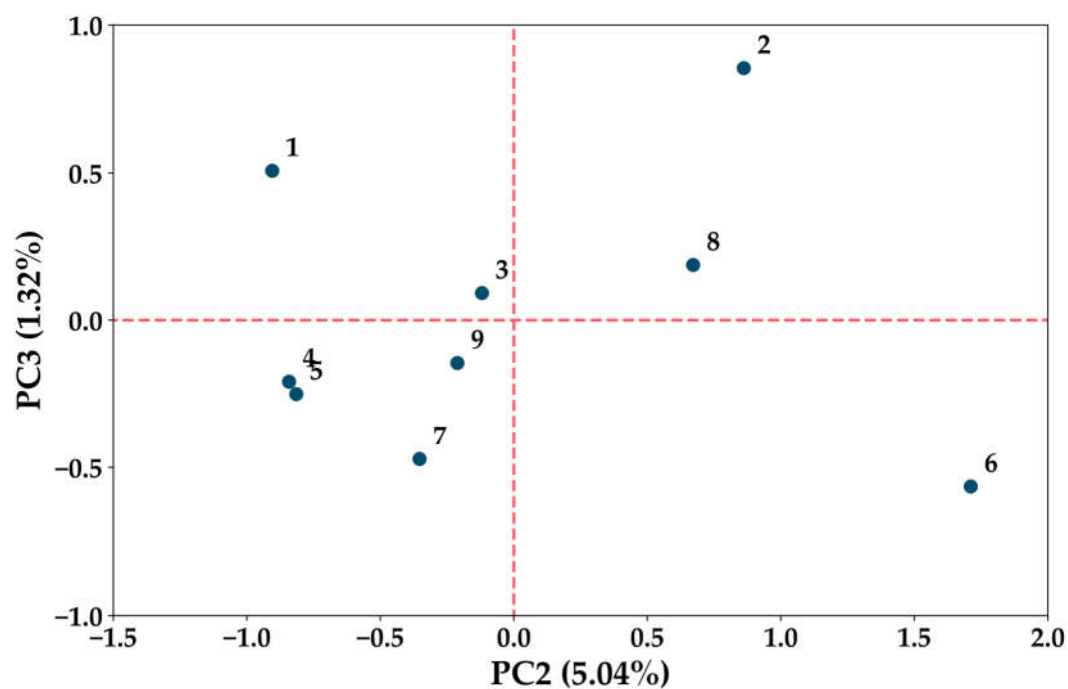

**Figure S9.** PCA of tested sensors 1-8 to NO<sub>2</sub>.
